# Supplementary material
Source: Springer Nature journal article supplement (https://www.springermedizin.de/resource/supplementary/12885_2009_2295_MOESM6_ESM.pdf/9460954)

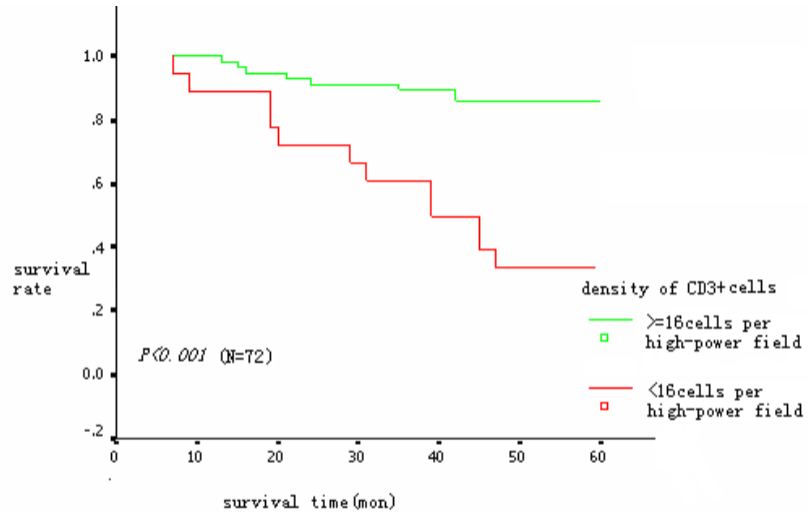

A

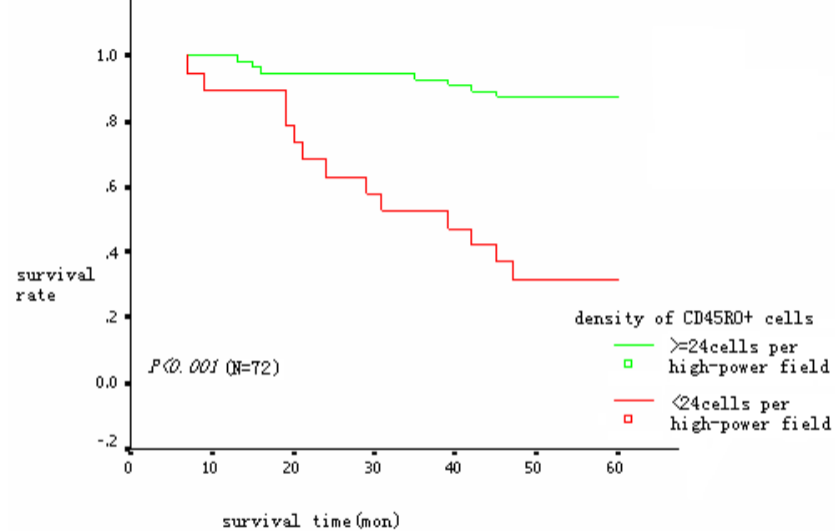

B

Supplement: MOESM6 [file 9460954]
